# Supplementary material for: Divergent evolution of NLR genes in the genus Glycine: impacts of annuals and perennials’ life history strategies
Source: Front Plant Sci. 2024 Jul 9;15:1383135. doi: 10.3389/fpls.2024.1383135 (PMC11263291; doi:10.3389/fpls.2024.1383135)
Supplement: Supplementary file 2 [file Table_2.xlsx]

## Sheet: Intact NLR genes
	Table S2: Number of intact and disrupted NLR genes identified from 9 species of Glycine
Sr No	Specie name	Groups	Domains	Total_count
1	Glycine crytoloba	CC-NLR	(CC)(NBARC)(LRR)	47
2	Glycine crytoloba	CCG10-NLR	(NBARC)(LRR)	19
3	Glycine crytoloba	CCR-NLR	(RPW8)(NBARC)(LRR)	4
4	Glycine crytoloba	TIR-NLR	(TIR)(NBARC)(LRR)	23
5	Glycine dolichocarpa AA	CC-NLR	(CC)(NBARC)(LRR)	29
6	Glycine dolichocarpa AA	CCG10-NLR	(NBARC)(LRR)	33
7	Glycine dolichocarpa AA	CCR-NLR	(RPW8)(NBARC)(LRR)	6
8	Glycine dolichocarpa AA	TIR-NLR	(TIR)(NBARC)(LRR)	7
9	Glycine dolichocarpa DD	CC-NLR	(CC)(NBARC)(LRR)	43
10	Glycine dolichocarpa DD	CCG10-NLR	(NBARC)(LRR)	38
11	Glycine dolichocarpa DD	CCR-NLR	(RPW8)(NBARC)(LRR)	6
12	Glycine dolichocarpa DD	TIR-NLR	(TIR)(NBARC)(LRR)	22
13	Glycine falcata	CC-NLR	(CC)(NBARC)(LRR)	40
14	Glycine falcata	CCG10-NLR	(NBARC)(LRR)	17
15	Glycine falcata	CCR-NLR	(RPW8)(NBARC)(LRR)	4
16	Glycine falcata	TIR-NLR	(TIR)(NBARC)(LRR)	16
17	Glycine latifolia	CC-NLR	(CC)(NBARC)(LRR)	69
18	Glycine latifolia	CCG10-NLR	(NBARC)(LRR)	24
19	Glycine latifolia	CCR-NLR	(RPW8)(NBARC)(LRR)	7
20	Glycine latifolia	TIR-NLR	(TIR)(NBARC)(LRR)	40
21	Glycine max	CC-NLR	(CC)(NBARC)(LRR)	160
22	Glycine max	CCG10-NLR	(NBARC)(LRR)	44
23	Glycine max	CCR-NLR	(RPW8)(NBARC)(LRR)	8
24	Glycine max	TIR-NLR	(TIR)(NBARC)(LRR)	136
25	Glycine soja	CC-NLR	(CC)(NBARC)(LRR)	161
26	Glycine soja	CCG10-NLR	(NBARC)(LRR)	43
27	Glycine soja	CCR-NLR	(RPW8)(NBARC)(LRR)	8
28	Glycine soja	TIR-NLR	(TIR)(NBARC)(LRR)	106
29	Glycine stenophita	CC-NLR	(CC)(NBARC)(LRR)	32
30	Glycine stenophita	CCG10-NLR	(NBARC)(LRR)	26
31	Glycine stenophita	CCR-NLR	(RPW8)(NBARC)(LRR)	4
32	Glycine stenophita	TIR-NLR	(TIR)(NBARC)(LRR)	16
33	Glycine syndetika	CC-NLR	(CC)(NBARC)(LRR)	52
34	Glycine syndetika	CCG10-NLR	(NBARC)(LRR)	35
35	Glycine syndetika	CCR-NLR	(RPW8)(NBARC)(LRR)	2
36	Glycine syndetika	TIR-NLR	(TIR)(NBARC)(LRR)	22
37	Glycine tomentella	CC-NLR	(CC)(NBARC)(LRR)	52
38	Glycine tomentella	CCG10-NLR	(NBARC)(LRR)	26
39	Glycine tomentella	CCR-NLR	(RPW8)(NBARC)(LRR)	5
40	Glycine tomentella	TIR-NLR	(TIR)(NBARC)(LRR)	16

## Sheet: Disrupted or partial NLR genes
Specie Name	Groups	unique_domains	Count
Glycine max	CC-NLR	(CC)(NBARC)(LRR)(LRR)	41
Glycine max	CC-NLR	(CC)(NBARC)	12
Glycine max	CC-NLR	(CC)(NBARC)(LRR)(CC)(NBARC)(LRR)(LRR)	2
Glycine max	CC-NLR	(CC)(NBARC)(LRR)(TRANSPOSON)	1
Glycine max	CC-NLR	(CC)(CC)(NBARC)(LRR)	1
Glycine max	CC-NLR	(CC)(PLOOP)	1
Glycine max	CCR-NLR		0
Glycine max	CCG10-NLR	(NBARC)(LRR)(LRR)	14
Glycine max	CCG10-NLR	(LRR)	3
Glycine max	CCG10-NLR	(NBARC)	3
Glycine max	CCG10-NLR	(PLOOP)(LRR)(LRR)	1
Glycine max	CCG10-NLR	(PLOOP)(LRR)	1
Glycine max	TIR-NLR	(TIR)(NBARC)	65
Glycine max	TIR-NLR	(TIR)(NBARC)(LRR)(CJID)	48
Glycine max	TIR-NLR	(TIR)	41
Glycine max	TIR-NLR	(TIR)(NBARC)(LRR)(LRR)(CJID)	24
Glycine max	TIR-NLR	(TIR)(PLOOP)	15
Glycine max	TIR-NLR	(TIR)(NBARC)(LRR)(TRANSPOSON)	6
Glycine max	TIR-NLR	(NBARC)(LRR)(CJID)	5
Glycine max	TIR-NLR	(TIR)(TIR)(NBARC)(LRR)	5
Glycine max	TIR-NLR	(TIR)(TIR)	2
Glycine max	TIR-NLR	(TIR)(OTHER)	2
Glycine max	TIR-NLR	(TIR)(NBARC)(LRR)(TIR)(NBARC)(LRR)	2
Glycine max	TIR-NLR	(TIR)(NBARC)(LRR)(TRANSPOSON)(TRANSPOSON)	2
Glycine max	TIR-NLR	(TIR)(NBARC)(OTHER)	2
Glycine max	TIR-NLR	(TIR)(NBARC)(LRR)(LRR)	2
Glycine max	TIR-NLR	(TIR)(TIR)(NBARC)(LRR)(OTHER)(TIR)(NBARC)(LRR)	1
Glycine max	TIR-NLR	(TIR)(NBARC)(LRR)(TIR)(TIR)(NBARC)	1
Glycine max	TIR-NLR	(TIR)(NBARC)(LRR)(LRR)(CJID)(TIR)(NBARC)(LRR)(CJID)	1
Glycine max	TIR-NLR	(OTHER)(OTHER)(OTHER)(TIR)(NBARC)(LRR)(CJID)	1
Glycine max	TIR-NLR	(TRANSPOSON)(TIR)	1
Glycine max	TIR-NLR	(TIR)(LRR)(LRR)(CJID)	1
Glycine crytolo	CC-NLR	(CC)(NBARC)(LRR)(LRR)	13
Glycine crytolo	CC-NLR	(CC)(NBARC)	4
Glycine crytolo	CC-NLR	(CC)(LRR)	3
Glycine crytolo	CC-NLR	(CC)(PLOOP)	1
Glycine crytolo	CC-NLR	(LRR)(CC)(NBARC)(LRR)	1
Glycine crytolo	CC-NLR	(CC)(LRR)(LRR)	1
Glycine crytolo	CC-NLR	(CC)(NBARC)(LRR)(NBARC)(LRR)	1
Glycine crytolo	CC-NLR	(NBARC)(CC)(NBARC)(LRR)	1
Glycine crytolo	CC-NLR	(CC)(NBARC)(LRR)(CC)(NBARC)	1
Glycine crytolo	CC-NLR	(CC)(LRR)(CC)(LRR)	1
Glycine crytolo	CC-NLR	(OTHER)(CC)(NBARC)	1
Glycine crytolo	CC-NLR	(CC)(CC)(NBARC)	1
Glycine crytolo	CCR-NLR	(PLOOP)(RPW8)(NBARC)(LRR)	1
Glycine crytolo	CCR-NLR	(RPW8)(NBARC)(LRR)(NBARC)(LRR)	1
Glycine crytolo	CCG10-NLR	(NBARC)(LRR)(LRR)	6
Glycine crytolo	CCG10-NLR	(LRR)	4
Glycine crytolo	CCG10-NLR	(PLOOP)(LRR)	3
Glycine crytolo	CCG10-NLR	(NBARC)	1
Glycine crytolo	CCG10-NLR	(LRR)(LRR)	1
Glycine crytolo	CCG10-NLR	(TRANSPOSON)(NBARC)	1
Glycine crytolo	CCG10-NLR	(NBARC)(LRR)(PLOOP-OTHER)(OTHER)	1
Glycine crytolo	TIR-NLR	(TIR)	33
Glycine crytolo	TIR-NLR	(TIR)(NBARC)(LRR)(CJID)	15
Glycine crytolo	TIR-NLR	(TIR)(NBARC)	10
Glycine crytolo	TIR-NLR	(NBARC)(LRR)(CJID)	7
Glycine crytolo	TIR-NLR	(TIR)(PLOOP)	5
Glycine crytolo	TIR-NLR	(TIR)(NBARC)(LRR)(LRR)(CJID)	3
Glycine crytolo	TIR-NLR	(TIR)(TIR)	3
Glycine crytolo	TIR-NLR	(OTHER)(TIR)(NBARC)(LRR)	2
Glycine crytolo	TIR-NLR	(TIR)(NBARC)(LRR)(TRANSPOSON)	2
Glycine crytolo	TIR-NLR	(CJID)(TIR)(PLOOP)(TIR)(NBARC)(LRR)(CJID)	1
Glycine crytolo	TIR-NLR	(OTHER)(OTHER)(TIR)(LRR)	1
Glycine crytolo	TIR-NLR	(TIR)(LRR)	1
Glycine crytolo	TIR-NLR	(TIR)(TRANSPOSON)(TRANSPOSON)(OTHER)(TRANSPOSON)(TRANSPOSON)(TRANSPOSON)	1
Glycine crytolo	TIR-NLR	(OTHER)(TIR)(NBARC)	1
Glycine crytolo	TIR-NLR	(TIR)(NBARC)(LRR)(PLOOP)	1
Glycine crytolo	TIR-NLR	(TIR)(OTHER)(TRANSPOSON)(TRANSPOSON)(TRANSPOSON)(OTHER)(OTHER)(NBARC)(LRR)	1
Glycine crytolo	TIR-NLR	(LRR)(CJID)	1
Glycine crytolo	TIR-NLR	(TIR)(PLOOP)(LRR)	1
Glycine crytolo	TIR-NLR	(TIR)(NBARC)(LRR)(NBARC)	1
Glycine crytolo	TIR-NLR	(OTHER)(TIR)	1
Glycine steno	CC-NLR	(CC)(NBARC)	7
Glycine steno	CC-NLR	(CC)(NBARC)(LRR)(LRR)	4
Glycine steno	CC-NLR	(NBARC)(LRR)	1
Glycine steno	CC-NLR	(CC)(NBARC)(LRR)(CC)(NBARC)(LRR)	1
Glycine steno	CC-NLR	(NBARC)(LRR)(CC)(NBARC)(LRR)	1
Glycine steno	CC-NLR	(LRR)(CC)(NBARC)(LRR)	1
Glycine steno	CC-NLR	(CC)(LRR)	1
Glycine steno	CC-NLR	(NBARC)(LRR)(CC)	1
Glycine steno	CCR-NLR	(RPW8)(PLOOP)(RPW8)(NBARC)(LRR)	1
Glycine steno	CCR-NLR	(RPW8)(NBARC)(LRR)(NBARC)(LRR)	1
Glycine steno	CCR-NLR	(RPW8)(NBARC)	1
Glycine steno	CCG10-NLR	(NBARC)(LRR)(LRR)	5
Glycine steno	CCG10-NLR	(LRR)	3
Glycine steno	CCG10-NLR	(NBARC)	2
Glycine steno	CCG10-NLR	(LRR)(TRANSPOSON)	1
Glycine steno	CCG10-NLR	(PLOOP)(LRR)(LRR)	1
Glycine steno	CCG10-NLR	(NBARC)(LRR)(NBARC)(LRR)	1
Glycine steno	CCG10-NLR	(OTHER)(NBARC)(LRR)	1
Glycine steno	CCG10-NLR	(NBARC)(LRR)(PLOOP-OTHER)(OTHER)	1
Glycine steno	CCG10-NLR	(OTHER)(LRR)	1
Glycine steno	TIR-NLR	(TIR)	22
Glycine steno	TIR-NLR	(TIR)(NBARC)(LRR)(CJID)	10
Glycine steno	TIR-NLR	(TIR)(NBARC)	8
Glycine steno	TIR-NLR	(NBARC)(LRR)(CJID)	6
Glycine steno	TIR-NLR	(TIR)(PLOOP)	5
Glycine steno	TIR-NLR	(TIR)(LRR)(CJID)	3
Glycine steno	TIR-NLR	(TIR)(NBARC)(LRR)(LRR)(CJID)	2
Glycine steno	TIR-NLR	(TIR)(LRR)	2
Glycine steno	TIR-NLR	(TIR)(TIR)	2
Glycine steno	TIR-NLR	(LRR)(TIR)(NBARC)	1
Glycine steno	TIR-NLR	(OTHER)(TIR)(NBARC)(LRR)(CJID)	1
Glycine steno	TIR-NLR	(LRR)(CJID)	1
Glycine steno	TIR-NLR	(OTHER)(TIR)(NBARC)(LRR)(OTHER)	1
Glycine steno	TIR-NLR	(OTHER)(TIR)(NBARC)	1
Glycine steno	TIR-NLR	(TIR)(NBARC)(LRR)(LRR)	1
Glycine syndeti	CC-NLR	(CC)(NBARC)	8
Glycine syndeti	CC-NLR	(CC)(NBARC)(LRR)(LRR)	6
Glycine syndeti	CC-NLR	(CC)(LRR)(LRR)	2
Glycine syndeti	CC-NLR	(NBARC)(LRR)(CC)(NBARC)(LRR)	2
Glycine syndeti	CC-NLR	(CC)(NBARC)(LRR)(LRR)(LRR)	1
Glycine syndeti	CC-NLR	(LRR)(CC)(NBARC)	1
Glycine syndeti	CC-NLR	(NBARC)(CC)(NBARC)(LRR)	1
Glycine syndeti	CC-NLR	(CC)(NBARC)(LRR)(CC)(NBARC)	1
Glycine syndeti	CC-NLR	(CC)(LRR)	1
Glycine syndeti	CC-NLR	(LRR)(CC)(NBARC)(LRR)(NBARC)(LRR)(CC)(NBARC)(LRR)	1
Glycine syndeti	CC-NLR	(LRR)(CC)(NBARC)(LRR)	1
Glycine syndeti	CCR-NLR	(RPW8)(NBARC)(LRR)(NBARC)(LRR)	1
Glycine syndeti	CCG10-NLR	(NBARC)(LRR)(LRR)	5
Glycine syndeti	CCG10-NLR	(LRR)	4
Glycine syndeti	CCG10-NLR	(NBARC)	3
Glycine syndeti	CCG10-NLR	(NBARC)(LRR)(LRR)(TRANSPOSON)(OTHER)(TRANSPOSON)(TRANSPOSON)(TRANSPOSON)	1
Glycine syndeti	CCG10-NLR	(LRR)(PKin)	1
Glycine syndeti	CCG10-NLR	(LRR)(LRR)	1
Glycine syndeti	CCG10-NLR	(PLOOP)(LRR)(LRR)	1
Glycine syndeti	CCG10-NLR	(PLOOP)(LRR)	1
Glycine syndeti	TIR-NLR	(TIR)	24
Glycine syndeti	TIR-NLR	(TIR)(NBARC)	10
Glycine syndeti	TIR-NLR	(NBARC)(LRR)(CJID)	8
Glycine syndeti	TIR-NLR	(TIR)(NBARC)(LRR)(CJID)	6
Glycine syndeti	TIR-NLR	(TIR)(PLOOP)	6
Glycine syndeti	TIR-NLR	(TIR)(NBARC)(LRR)(TRANSPOSON)	5
Glycine syndeti	TIR-NLR	(TIR)(LRR)	4
Glycine syndeti	TIR-NLR	(LRR)(CJID)	2
Glycine syndeti	TIR-NLR	(TIR)(TIR)	2
Glycine syndeti	TIR-NLR	(TIR)(NBARC)(LRR)(NBARC)(LRR)	1
Glycine syndeti	TIR-NLR	(TIR)(NBARC)(LRR)(LRR)(CJID)	1
Glycine syndeti	TIR-NLR	(NBARC)(LRR)(LRR)(TIR)(NBARC)(LRR)(LRR)(CJID)	1
Glycine syndeti	TIR-NLR	(TIR)(NBARC)(TRANSPOSON)(TRANSPOSON)(OTHER)(OTHER)	1
Glycine syndeti	TIR-NLR	(TIR)(NBARC)(LRR)(TIR)(NBARC)(LRR)(TRANSPOSON)(TRANSPOSON)(TRANSPOSON)(TRANSPOSON)	1
Glycine syndeti	TIR-NLR	(TIR)(NBARC)(LRR)(LRR)	1
Glycine syndeti	TIR-NLR	(NBARC)(LRR)(TIR)	1
Glycine syndeti	TIR-NLR	(TIR)(PLOOP)(TRANSPOSON)(OTHER)(TRANSPOSON)(TRANSPOSON)	1
Glycine syndeti	TIR-NLR	(OTHER)(OTHER)(TIR)(PLOOP)(LRR)(OTHER)	1
Glycine syndeti	TIR-NLR	(TIR)(TRANSPOSON)(TRANSPOSON)(OTHER)(TRANSPOSON)(OTHER)(TRANSPOSON)(OTHER)(OTHER)	1
Glycine syndeti	TIR-NLR	(TIR)(PLOOP)(TIR)(NBARC)(LRR)(CJID)	1
Glycine syndeti	TIR-NLR	(TIR)(LRR)(CJID)	1
Glycine latifoli	CC-NLR	(CC)(NBARC)	27
Glycine latifoli	CC-NLR	(CC)(NBARC)(LRR)(LRR)	7
Glycine latifoli	CC-NLR	(CC)(NBARC)(LRR)(OTHER)	3
Glycine latifoli	CC-NLR	(CC)(NBARC)(LRR)(LRR)(OTHER)	2
Glycine latifoli	CC-NLR	(OTHER)(CC)(NBARC)(LRR)	2
Glycine latifoli	CC-NLR	(OTHER)(CC)(NBARC)	2
Glycine latifoli	CC-NLR	(CC)(PLOOP)(LRR)	1
Glycine latifoli	CC-NLR	(CC)(NBARC)(LRR)(TRANSPOSON)(OTHER)	1
Glycine latifoli	CC-NLR	(TPR)(TPR)(OTHER)(CC)(NBARC)(LRR)	1
Glycine latifoli	CC-NLR	(CC)(NBARC)(LRR)(CC)	1
Glycine latifoli	CC-NLR	(CC)(NBARC)(TRANSPOSON)(OTHER)	1
Glycine latifoli	CC-NLR	(NBARC)	1
Glycine latifoli	CC-NLR	(CC)(PLOOP)(TRANSPOSON)	1
Glycine latifoli	CC-NLR	(CC)(PLOOP)(LRR)(TRANSPOSON)	1
Glycine latifoli	CC-NLR	(TRANSPOSON)(CC)(NBARC)(LRR)(LRR)	1
Glycine latifoli	CC-NLR	(TRANSPOSON)(CC)(NBARC)(LRR)	1
Glycine latifoli	CC-NLR	(TRANSPOSON)(CC)(NBARC)	1
Glycine latifoli	CC-NLR	(CC)(NBARC)(LRR)(TRANSPOSON)(TRANSPOSON)	1
Glycine latifoli	CC-NLR	(CC)(NBARC)(CC)(NBARC)(LRR)	1
Glycine latifoli	CC-NLR	(CC)(PLOOP)(OTHER)(OTHER)(PLOOP-OTHER)	1
Glycine latifoli	CCR-NLR	(RPW8)(PLOOP)	2
Glycine latifoli	CCR-NLR	(TRANSPOSON)(TRANSPOSON)(TRANSPOSON)(OTHER)(TRANSPOSON)(PLOOP)(RPW8)(NBARC)(LRR)	1
Glycine latifoli	CCG10-NLR	(LRR)	6
Glycine latifoli	CCG10-NLR	(NBARC)(LRR)(LRR)	4
Glycine latifoli	CCG10-NLR	(NBARC)	4
Glycine latifoli	CCG10-NLR	(PLOOP)(LRR)	2
Glycine latifoli	CCG10-NLR	(NBARC)(LRR)(LRR)(LRR)	1
Glycine latifoli	CCG10-NLR	(NBARC)(LRR)(TRANSPOSON)(TRANSPOSON)(TRANSPOSON)(TRANSPOSON)	1
Glycine latifoli	CCG10-NLR	(NBARC)(PLOOP-OTHER)(OTHER)	1
Glycine latifoli	CCG10-NLR	(TRANSPOSON)(TRANSPOSON)(OTHER)(TRANSPOSON)(TRANSPOSON)(TRANSPOSON)(PLOOP)(LRR)	1
Glycine latifoli	TIR-NLR	(TIR)	53
Glycine latifoli	TIR-NLR	(TIR)(NBARC)	21
Glycine latifoli	TIR-NLR	(TIR)(NBARC)(LRR)(CJID)	16
Glycine latifoli	TIR-NLR	(TIR)(PLOOP)	8
Glycine latifoli	TIR-NLR	(TIR)(NBARC)(LRR)(OTHER)	4
Glycine latifoli	TIR-NLR	(NBARC)(LRR)(CJID)	3
Glycine latifoli	TIR-NLR	(OTHER)(TIR)(NBARC)(LRR)	3
Glycine latifoli	TIR-NLR	(OTHER)(TIR)(NBARC)	2
Glycine latifoli	TIR-NLR	(TIR)(LRR)	2
Glycine latifoli	TIR-NLR	(TIR)(PLOOP)(LRR)(CJID)	2
Glycine latifoli	TIR-NLR	(TIR)(TRANSPOSON)(TRANSPOSON)(OTHER)(TRANSPOSON)(OTHER)(TRANSPOSON)(TRANSPOSON)	1
Glycine latifoli	TIR-NLR	(OTHER)(OTHER)(TIR)(PLOOP)	1
Glycine latifoli	TIR-NLR	(LRR)(TIR)(NBARC)	1
Glycine latifoli	TIR-NLR	(TIR)(NBARC)(LRR)(TIR)(NBARC)(LRR)	1
Glycine latifoli	TIR-NLR	(TIR)(OTHER)(PKin)	1
Glycine latifoli	TIR-NLR	(TIR)(OTHER)(PLOOP-OTHER)(OTHER)(OTHER)	1
Glycine latifoli	TIR-NLR	(TIR)(PLOOP)(LRR)	1
Glycine latifoli	TIR-NLR	(OTHER)(OTHER)(OTHER)(TIR)	1
Glycine latifoli	TIR-NLR	(PLOOP-OTHER)(PLOOP-OTHER)(TIR)(TIR)(TIR)(TIR)	1
Glycine latifoli	TIR-NLR	(OTHER)(OTHER)(TIR)	1
Glycine latifoli	TIR-NLR	(TIR)(TIR)	1
Glycine latifoli	TIR-NLR	(TIR)(NBARC)(LRR)(CJID)(LRR)	1
Glycine latifoli	TIR-NLR	(OTHER)(TIR)(NBARC)(LRR)(CJID)	1
Glycine latifoli	TIR-NLR	(TIR)(TIR)(NBARC)(TIR)(NBARC)	1
Glycine latifoli	TIR-NLR	(OTHER)(TIR)(NBARC)(LRR)(TRANSPOSON)(TRANSPOSON)	1
Glycine latifoli	TIR-NLR	(TIR)(NBARC)(LRR)(TIR)(NBARC)(LRR)(TIR)(NBARC)(LRR)	1
Glycine latifoli	TIR-NLR	(TIR)(NBARC)(LRR)(NBARC)	1
Glycine latifoli	TIR-NLR	(OTHER)(OTHER)(TIR)(NBARC)(LRR)	1
Glycine latifoli	TIR-NLR	(OTHER)(OTHER)(TIR)(NBARC)(LRR)(TIR)	1
Glycine latifoli	TIR-NLR	(TIR)(NBARC)(LRR)(TRANSPOSON)(TRANSPOSON)	1
Glycine latifoli	TIR-NLR	(NBARC)(LRR)(CJID)(TIR)	1
Glycine latifoli	TIR-NLR	(TIR)(TIR)(NBARC)	1
Glycine latifoli	TIR-NLR	(TIR)(NBARC)(LRR)(LRR)	1
Glycine latifoli	TIR-NLR	(TIR)(NBARC)(LRR)(TRANSPOSON)	1
Glycine latifoli	TIR-NLR	(OTHER)(OTHER)(NBARC)(LRR)(CJID)	1
Glycine latifoli	TIR-NLR	(TIR)(LRR)(CJID)	1
Glycine latifoli	TIR-NLR	(TIR)(PLOOP)(TIR)	1
Glycine latifoli	TIR-NLR	(TRANSPOSON)(TIR)(OTHER)	1
Glycine soja	CC-NLR	(CC)(NBARC)(LRR)(LRR)	29
Glycine soja	CC-NLR	(CC)(NBARC)	5
Glycine soja	CC-NLR	(CC)(CC)(NBARC)(LRR)	1
Glycine soja	CC-NLR	(CC)(NBARC)(LRR)(TRANSPOSON)	1
Glycine soja	CCR-NLR		0
Glycine soja	CCG10-NLR	(NBARC)(LRR)(LRR)	11
Glycine soja	CCG10-NLR	(LRR)	3
Glycine soja	CCG10-NLR	(NBARC)	1
Glycine soja	CCG10-NLR	(PLOOP)(LRR)(LRR)	1
Glycine soja	TIR-NLR	(TIR)(NBARC)(LRR)(CJID)	49
Glycine soja	TIR-NLR	(TIR)	34
Glycine soja	TIR-NLR	(TIR)(NBARC)	27
Glycine soja	TIR-NLR	(TIR)(NBARC)(LRR)(LRR)(CJID)	19
Glycine soja	TIR-NLR	(TIR)(NBARC)(LRR)(TRANSPOSON)	15
Glycine soja	TIR-NLR	(TIR)(PLOOP)	13
Glycine soja	TIR-NLR	(TIR)(TIR)(NBARC)(LRR)	8
Glycine soja	TIR-NLR	(TIR)(TIR)	7
Glycine soja	TIR-NLR	(TIR)(NBARC)(TIR)(TIR)(NBARC)	4
Glycine soja	TIR-NLR	(NBARC)(LRR)(CJID)	4
Glycine soja	TIR-NLR	(TIR)(NBARC)(LRR)(TRANSPOSON)(TRANSPOSON)	2
Glycine soja	TIR-NLR	(TIR)(OTHER)	2
Glycine soja	TIR-NLR	(TIR)(TIR)(NBARC)	2
Glycine soja	TIR-NLR	(TIR)(NBARC)(LRR)(TIR)(LRR)	1
Glycine soja	TIR-NLR	(TIR)(NBARC)(OTHER)	1
Glycine soja	TIR-NLR	(TIR)(NBARC)(LRR)(LRR)(CJID)(TIR)(NBARC)(LRR)(CJID)	1
Glycine soja	TIR-NLR	(TIR)(NBARC)(LRR)(TIR)(NBARC)(LRR)	1
Glycine soja	TIR-NLR	(TIR)(TIR)(NBARC)(LRR)(OTHER)(TIR)(NBARC)(LRR)	1
Glycine soja	TIR-NLR	(TIR)(NBARC)(LRR)(CJID)(TIR)(NBARC)(LRR)	1
Glycine soja	TIR-NLR	(TIR)(LRR)(LRR)(CJID)	1
Glycine tomen	CC-NLR	(CC)(NBARC)	17
Glycine tomen	CC-NLR	(CC)(NBARC)(LRR)(LRR)	5
Glycine tomen	CC-NLR	(CC)(NBARC)(LRR)(CC)(NBARC)(LRR)	4
Glycine tomen	CC-NLR	(NBARC)(CC)(CC)	1
Glycine tomen	CC-NLR	(CC)(NBARC)(LRR)(LRR)(CC)(NBARC)(LRR)	1
Glycine tomen	CC-NLR	(CC)(NBARC)(LRR)(NBARC)(LRR)	1
Glycine tomen	CC-NLR	(CC)(NBARC)(LRR)(CC)(NBARC)	1
Glycine tomen	CC-NLR	(OTHER)(NBARC)	1
Glycine tomen	CC-NLR	(CC)(NBARC)(LRR)(CC)	1
Glycine tomen	CC-NLR	(CC)(LRR)(LRR)	1
Glycine tomen	CC-NLR	(CC)(LRR)	1
Glycine tomen	CC-NLR	(CC)(LRR)(PLOOP)(CC)(LRR)(CC)(LRR)	1
Glycine tomen	CC-NLR	(PLOOP)(CC)	1
Glycine tomen	CC-NLR	(CC)(NBARC)(OTHER)	1
Glycine tomen	CC-NLR	(CC)(NBARC)(LRR)(LRR)(OTHER)	1
Glycine tomen	CCR-NLR	(RPW8)(NBARC)(LRR)(NBARC)(LRR)	1
Glycine tomen	CCG10-NLR	(NBARC)(LRR)(LRR)	7
Glycine tomen	CCG10-NLR	(LRR)	6
Glycine tomen	CCG10-NLR	(NBARC)	5
Glycine tomen	CCG10-NLR	(NBARC)(LRR)(LRR)(LRR)	2
Glycine tomen	CCG10-NLR	(NBARC)(LRR)(NBARC)	1
Glycine tomen	CCG10-NLR	(PLOOP)(LRR)	1
Glycine tomen	CCG10-NLR	(LRR)(LRR)	1
Glycine tomen	TIR-NLR	(TIR)	25
Glycine tomen	TIR-NLR	(TIR)(NBARC)	7
Glycine tomen	TIR-NLR	(TIR)(LRR)	5
Glycine tomen	TIR-NLR	(TIR)(NBARC)(LRR)(CJID)	5
Glycine tomen	TIR-NLR	(TIR)(TIR)	4
Glycine tomen	TIR-NLR	(TIR)(PLOOP)	3
Glycine tomen	TIR-NLR	(LRR)(LRR)(CJID)	2
Glycine tomen	TIR-NLR	(TIR)(NBARC)(LRR)(LRR)(CJID)	2
Glycine tomen	TIR-NLR	(NBARC)(LRR)(CJID)	2
Glycine tomen	TIR-NLR	(NBARC)(LRR)(LRR)(CJID)	2
Glycine tomen	TIR-NLR	(TRANSPOSON)(OTHER)(TIR)(NBARC)(LRR)	1
Glycine tomen	TIR-NLR	(TIR)(NBARC)(LRR)(TRANSPOSON)(TRANSPOSON)	1
Glycine tomen	TIR-NLR	(TIR)(TIR)(NBARC)(LRR)(CJID)(OTHER)	1
Glycine tomen	TIR-NLR	(TIR)(PLOOP)(LRR)	1
Glycine tomen	TIR-NLR	(TIR)(NBARC)(LRR)(TRANSPOSON)(TIR)(NBARC)(LRR)(TRANSPOSON)	1
Glycine tomen	TIR-NLR	(TIR)(NBARC)(LRR)(OTHER)	1
Glycine tomen	TIR-NLR	(TIR)(NBARC)(LRR)(TIR)(NBARC)(LRR)(LRR)	1
Glycine tomen	TIR-NLR	(OTHER)(TIR)(NBARC)(LRR)	1
Glycine tomen	TIR-NLR	(OTHER)(TIR)	1
Glycine tomen	TIR-NLR	(OTHER)(TIR)(LRR)	1
Glycine tomen	TIR-NLR	(TIR)(LRR)(CJID)	1
Glycine tomen	TIR-NLR	(TIR)(OTHER)(PLOOP-OTHER)(OTHER)	1
Glycine tomen	TIR-NLR	(TIR)(OTHER)	1
Glycine falcata	CC-NLR	(CC)(NBARC)(LRR)(LRR)	9
Glycine falcata	CC-NLR	(CC)(NBARC)	8
Glycine falcata	CC-NLR	(CC)(LRR)	4
Glycine falcata	CC-NLR	(NBARC)(LRR)(LRR)(LRR)(LRR)(LRR)(LRR)	3
Glycine falcata	CC-NLR	(NBARC)(LRR)	2
Glycine falcata	CC-NLR	(CC)(LRR)(LRR)	1
Glycine falcata	CC-NLR	(CC)(NBARC)(LRR)(LRR)(LRR)	1
Glycine falcata	CC-NLR	(NBARC)(LRR)(LRR)(LRR)(LRR)(LRR)	1
Glycine falcata	CC-NLR	(CC)(NBARC)(ARM)	1
Glycine falcata	CC-NLR	(NBARC)	1
Glycine falcata	CC-NLR	(NBARC)(LRR)(LRR)(LRR)(LRR)(LRR)(LRR)(LRR)	1
Glycine falcata	CC-NLR	(CC)(NBARC)(LRR)(CC)(NBARC)(LRR)(CC)	1
Glycine falcata	CC-NLR	(NBARC)(LRR)(LRR)(LRR)(LRR)	1
Glycine falcata	CC-NLR	(CC)(PLOOP)	1
Glycine falcata	CC-NLR	(LRR)(CC)(NBARC)(LRR)	1
Glycine falcata	CCR-NLR	(RPW8)(NBARC)(LRR)(NBARC)(OTHER)	1
Glycine falcata	CCR-NLR	(RPW8)(RPW8)(NBARC)(LRR)(RPW8)(NBARC)(LRR)	1
Glycine falcata	CCG10-NLR	(NBARC)	7
Glycine falcata	CCG10-NLR	(NBARC)(LRR)(LRR)	6
Glycine falcata	CCG10-NLR	(LRR)	3
Glycine falcata	CCG10-NLR	(PLOOP)(LRR)	2
Glycine falcata	CCG10-NLR	(NBARC)(LRR)(LRR)(OTHER)(OTHER)	1
Glycine falcata	CCG10-NLR	(NBARC)(LRR)(OTHER)	1
Glycine falcata	TIR-NLR	(TIR)	32
Glycine falcata	TIR-NLR	(TIR)(NBARC)(LRR)(CJID)	10
Glycine falcata	TIR-NLR	(TIR)(PLOOP)	6
Glycine falcata	TIR-NLR	(TIR)(NBARC)	4
Glycine falcata	TIR-NLR	(TIR)(LRR)	4
Glycine falcata	TIR-NLR	(TIR)(LRR)(CJID)	2
Glycine falcata	TIR-NLR	(NBARC)(LRR)(CJID)	2
Glycine falcata	TIR-NLR	(TIR)(NBARC)(LRR)(TRANSPOSON)	1
Glycine falcata	TIR-NLR	(LRR)(TIR)	1
Glycine falcata	TIR-NLR	(OTHER)(TIR)	1
Glycine falcata	TIR-NLR	(TIR)(TIR)	1
Glycine falcata	TIR-NLR	(TIR)(NBARC)(LRR)(OTHER)	1
Glycine falcata	TIR-NLR	(TIR)(TIR)(NBARC)(LRR)	1
Glycine falcata	TIR-NLR	(TIR)(NBARC)(LRR)(CJID)(TRANSPOSON)	1
Glycine falcata	TIR-NLR	(TIR)(NBARC)(LRR)(TRANSPOSON)(OTHER)(LRR)	1
Glycine falcata	TIR-NLR	(TIR)(NBARC)(LRR)(TRANSPOSON)(TRANSPOSON)(TRANSPOSON)(TRANSPOSON)(OTHER)(OTHER)	1
Glycine falcata	TIR-NLR	(TRANSPOSON)(TRANSPOSON)(OTHER)(TRANSPOSON)(TIR)(NBARC)(LRR)	1
Glycine falcata	TIR-NLR	(TIR)(PLOOP)(LRR)	1
Glycine falcata	TIR-NLR	(NBARC)(TRANSPOSON)(OTHER)(TRANSPOSON)(LRR)(CJID)	1
Glycine falcata	TIR-NLR	(TIR)(OTHER)	1
Glycine dolicho DD	CC-NLR	(TIR)(NBARC)	8
Glycine dolicho DD	CC-NLR	(TIR)(NBARC)(LRR)(CJID)	5
Glycine dolicho DD	CC-NLR	(NBARC)(LRR)(CJID)	5
Glycine dolicho DD	CC-NLR	(TIR)(PLOOP)	5
Glycine dolicho DD	CC-NLR	(NBARC)(LRR)(LRR)(CJID)	4
Glycine dolicho DD	CC-NLR	(LRR)(CJID)	1
Glycine dolicho DD	CC-NLR	(TIR)(NBARC)(LRR)(LRR)(CJID)	1
Glycine dolicho DD	CC-NLR	(TIR)(NBARC)(OTHER)	1
Glycine dolicho DD	CC-NLR	(NBARC)(LRR)(TIR)(NBARC)(LRR)(OTHER)	1
Glycine dolicho DD	CCR-NLR	(RPW8)(NBARC)	1
Glycine dolicho DD	CCG10-NLR	(NBARC)(LRR)(LRR)	5
Glycine dolicho DD	CCG10-NLR	(LRR)	5
Glycine dolicho DD	CCG10-NLR	(PLOOP)(LRR)	2
Glycine dolicho DD	CCG10-NLR	(NBARC)	2
Glycine dolicho DD	CCG10-NLR	(OTHER)(LRR)	1
Glycine dolicho DD	CCG10-NLR	(NBARC)(LRR)(OTHER)	1
Glycine dolicho DD	CCG10-NLR	(NBARC)(LRR)(LRR)(LRR)	1
Glycine dolicho DD	CCG10-NLR	(NBARC)(LRR)(NBARC)	1
Glycine dolicho DD	TIR-NLR	(TIR)(NBARC)	8
Glycine dolicho DD	TIR-NLR	(TIR)(NBARC)(LRR)(CJID)	5
Glycine dolicho DD	TIR-NLR	(NBARC)(LRR)(CJID)	5
Glycine dolicho DD	TIR-NLR	(TIR)(PLOOP)	5
Glycine dolicho DD	TIR-NLR	(NBARC)(LRR)(LRR)(CJID)	4
Glycine dolicho DD	TIR-NLR	(LRR)(CJID)	1
Glycine dolicho DD	TIR-NLR	(TIR)(NBARC)(LRR)(LRR)(CJID)	1
Glycine dolicho DD	TIR-NLR	(TIR)(NBARC)(OTHER)	1
Glycine dolicho DD	TIR-NLR	(NBARC)(LRR)(TIR)(NBARC)(LRR)(OTHER)	1
Glycine dolicho AA	CC-NLR	(CC)(LRR)	1
Glycine dolicho AA	CC-NLR	(CC)(NBARC)	4
Glycine dolicho AA	CC-NLR	(CC)(NBARC)(LRR)(LRR)	6
Glycine dolicho AA	CC-NLR	(CC)(NBARC)(LRR)(TRANSPOSON)(OTHER)	1
Glycine dolicho AA	CC-NLR	(LRR)(CC)(NBARC)(LRR)	1
Glycine dolicho AA	CCR-NLR	(RPW8)(NBARC)	1
Glycine dolicho AA	CCG10-NLR	(LRR)	4
Glycine dolicho AA	CCG10-NLR	(LRR)(PKin)	1
Glycine dolicho AA	CCG10-NLR	(NBARC)	1
Glycine dolicho AA	CCG10-NLR	(NBARC)(LRR)(LRR)	4
Glycine dolicho AA	CCG10-NLR	(PLOOP)(LRR)	1
Glycine dolicho AA	CCG10-NLR	(PLOOP)(LRR)(LRR)	1
Glycine dolicho AA	CCG10-NLR	(TRANSPOSON)(LRR)	1
Glycine dolicho AA	TIR-NLR	(LRR)(CJID)	3
Glycine dolicho AA	TIR-NLR	(NBARC)(LRR)(CJID)	4
Glycine dolicho AA	TIR-NLR	(NBARC)(LRR)(LRR)(CJID)	3
Glycine dolicho AA	TIR-NLR	(TIR)(NBARC)	4
Glycine dolicho AA	TIR-NLR	(TIR)(NBARC)(LRR)(CJID)	5
Glycine dolicho AA	TIR-NLR	(TIR)(NBARC)(LRR)(LRR)	1
Glycine dolicho AA	TIR-NLR	(TIR)(NBARC)(LRR)(LRR)(CJID)	2
Glycine dolicho AA	TIR-NLR	(TIR)(PLOOP)	5
Glycine dolicho AA	TIR-NLR	(TIR)(PLOOP)(TIR)(NBARC)	1
